# Supplementary material
Source: ML conference proceedings conference paper supplement (https://openreview.net/forum?id=5uIL1E8h1E)
Supplement: supplementary_material [file attachment]

## Appendix

In this appendix, we include the following items, described in the subsequent subsections respectively.

- Code, datasets and model weights.
- Formulation of Markov decision process for solution construction.
- Illustration of graph representation for partial solutions in Figure 2.
- REINFORCE algorithm in our approach.
- Experimental settings.
- Additional Experiments.

### A Code, Datasets and Model Weights

Our code, datasets and pre-trained weights are in the supplementary folder `ResidualScheduling`. The code includes the following: First, setup the virtual environment, Then, install required packages in the environment. Finally, execute the code with the commands in the `README` file. All hyperparameters are also listed in `README` file.

We collect the following dataset for evaluation. For JSP dataset, we collect 13 collections generated for the experiments shown in Figure 4, and other seven JSP benchmarks, TA, ABZ, FT, ORB, YN, SWV and LA. For FJSP dataset, we collect two FJSP benchmarks, MK and LA, and the instances generated from the work (Song et al., 2023).

There are four weights according to the final models for RS and RS+op with JSP and FJSP cases, denoted as `RS_JSP`, `RS+op_JSP`, `RS_FJSP`, and `RS+op_FJSP`.

### B Formulation of Markov Decision Process for Solution Construction

In Subsection 2.2, an approach based on solution construction can be also viewed as the so-called *Markov decision process (MDP)*. An MDP is a stochastic decision-making process widely used in reinforcement learning, generally defined by a tuple  $(\mathcal{S}, \mathcal{A}, \mathcal{R}, \mathcal{P})$ , where  $\mathcal{S}$  is the finite set of the states,  $\mathcal{A}$  is the set of the available actions,  $\mathcal{R}$  is the reward function and  $\mathcal{P}$  is the transition probability function. The objective is to find a policy that maximizes the agent’s cumulative rewards<sup>1</sup>.

Following the above MDP definition, we formulate the process of solution construction for JSP and FJSP problems as follows.

- $\mathcal{S}$  specifies states each representing an instance associated with the information of partial solutions  $S$  like those in Figure 2.
- $\mathcal{A}$  specifies actions each of which selects machine-operation pairs  $(M, O)$  to dispatch the operation  $O$  on the machine  $M$  on given states.
- $\mathcal{R}$  specifies a reward to indicate a negative of the additional processing time for the dispatched action.
- $\mathcal{P}$  specifies how states are transited from one partial solution  $S$  to the next  $S'$  after an action, as described in Subsection 2.2 accordingly.

An episode starts from the initial partial solution and repeats transitions till the end when the partial solution is a solution. The cumulative reward is the negative of makespan  $T^{(mks p)}$ , i.e., the total complete time. The objective is to maximize the cumulative reward, i.e., minimize the makespan. In the past, many methods for JSP and FJSP based on reinforcement learning such as (Park et al., 2020; Luo, 2020; Zhang et al., 2020; Park et al., 2021b,a) followed this MDP formulation.

---

<sup>1</sup>Discount factor  $\gamma$  is not included in the tuple, since it is always one and thus not used in this paper.

## 537 C Illustration of Graph Representation for Partial Solutions

538 In Figure 3 (a), we illustrate graph representation of  $S_3$ . In this section, Figure 5 illustrates the  
 539 step-by-step graph representations respectively corresponding to all the partial solutions in Figure 2  
 540 in Subsection 3.2. Again, the gray nodes are *completed*, the red *ongoing*, the yellow *ready* and the  
 541 white *unready*.

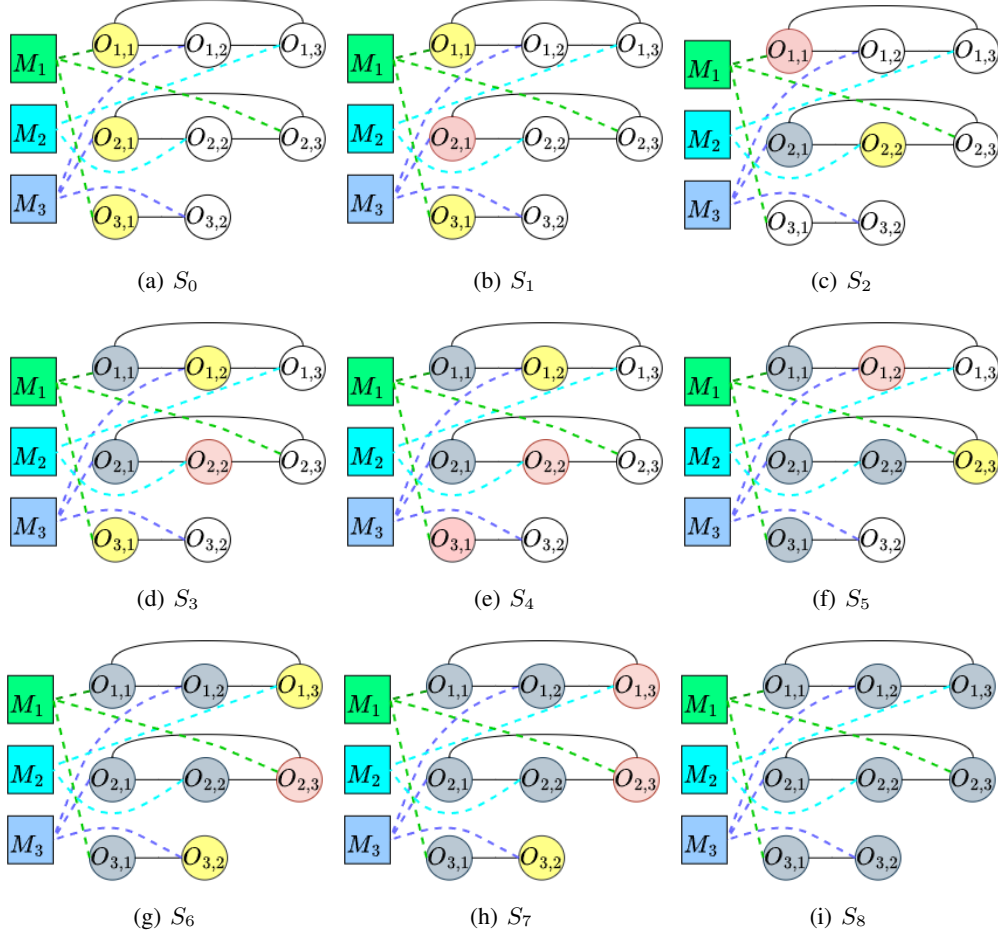

Figure 5: (a)-(i) are corresponding to partial solutions in Figure 2 (a)-(i), respectively.

## 542 D REINFORCE Algorithm in Our Approach

543 Our residual scheduling approach basically follows REINFORCE (Sutton and Barto, 2018) to update  
 544 our model by policy gradient with a normalized advantage makespan based on a baseline policy  
 545 and an entropy bonus to ensure sufficient exploration like PPO. Algorithm 1 (next page) shows our  
 546 REINFORCE training process with the normalized advantage makespan described in Section 3.4.  
 547 The model policy  $\pi_\theta$  is parameterized by  $\theta$  initialized at random, and a baseline policy  $\pi_b$  is given,  
 548 which is a lightweight PDR, MWKR, in this paper. The learning rate  $\alpha \in (0, 1)$  is initialized to  $10^{-4}$   
 549 and decayed by a factor of 0.99 every  $P = 1000$  episodes in this paper.

## 550 E Experimental Settings

551 In this section, we first describe settings of our model in Appendix E.1 and then list the details of JSP  
 552 and FJSP open benchmarks used in our experiments in Appendix E.2.

---

**Algorithm 1** REINFORCE with a normalized advantage for JSP and FJSP

---

```
1: Input: Initial policy  $\pi_\theta$ , learning rate  $\alpha \in (0, 1)$ , entropy bonus coefficient  $c$ , a baseline policy  $\pi_b$ ;  
2: for Episode  $e = 0, 1, \dots$  do  
3:   Use policy  $\pi_\theta$  to rollout an episode:  $\{S_1, a_1, S_2, a_2, \dots, S_T\}$   
4:   for  $t = 0, 1, 2, \dots, T$  do  
5:     Use the baseline policy  $\pi_b$  to rollout and obtain  $T_{\pi_b}^{(mksp)}(S_t, a_t)$   
6:     Calculate  $T_{\pi_\theta}^{(mksp)}(S_t, a_t)$   
7:     Calculate normalized advantage  $A_{\pi_\theta}(S_t, a_t)$  following Equation (5)  
8:     Update policy  $\theta = \theta + \alpha \nabla_\theta (\log \pi_\theta A_{\pi_\theta}(S_t, a_t) + c H_{\pi_\theta}(S_t))$   
9:   end for  
10:  Update learning rate every  $P = 1000$  episodes  
11: end for
```

---

## E.1 Model Settings

In this subsection, we first list the settings of our model in Table 5. Particularly, the entropy bonus coefficient  $c$  is used for the weight of entropy in line 8 of Algorithm 1, and the initial learning rate  $\alpha$  is used in lines 1 and 8 of Algorithm 1.

Table 5: Model hyperparameters.

| Item                               | Value     | Description                                                                        |
|------------------------------------|-----------|------------------------------------------------------------------------------------|
| HGIN layers                        | 3         | Layer number of GNN.                                                               |
| FC layers of MLP                   | 2         | Layer number of MLP.                                                               |
| Hidden dimension                   | 256       | Hidden vector dimension for GNN and policy network.                                |
| Episodes                           | 1,000,000 | Training episodes                                                                  |
| Entropy bonus coefficient ( $c$ )  | $10^{-2}$ | The weight of entropy bonus in the loss function.                                  |
| Initial learning rate ( $\alpha$ ) | $10^{-4}$ | Initialized with $10^{-4}$ and then decayed with 0.99 rate for every 1000 episodes |
| Optimizer                          | Adam      | Adam with $\beta_1 = 0.9$ and $\beta_2 = 0.999$                                    |

In practice, one model is trained for each of  $(N, M)$ , (6,6), (10,10) and (15,15), and each of baseline policies, MWKR, MOR, SPT and FIFO. Each of models is trained with 1000 iterations, for each of which model parameters are updated with 1000 episodes (one million of episodes in total). For each episode, one scheduling instance is generated for training by the procedure subject to  $(N, M)$  as in Subsection 4.1.

For JSP, we also generate a validation dataset of the three collections,  $20 \times 20$ ,  $50 \times 20$  and  $100 \times 20$ , each with 10 instances. Among the 1000 sets of model parameters, the one performing best for the validation dataset is chosen for testing in the rest of experiments. Table 6 shows the average makespans of the four models trained with different baselines respectively and with (10,10) on the validation dataset. The one with MWKR clearly outperforms other baselines on the validation dataset. Thus, MWKR is chosen as the baseline in this paper. Similarly, Table 7 shows the average makespans of three models trained with different training sizes (6,6), (10,10) and (15,15) respectively and with MWKR on the validation dataset. The one with (10,10) performs best, except for that the one with (15,15) performs slightly better for the collection of  $100 \times 20$ . Thus, this paper still chooses (10,10) since it performs well in general and has less training costs when compared to (15,15).

Table 6: Average makespans of models with different baseline policies  $\pi_b$  on JSP validation dataset.

| $\pi_b$ | $20 \times 20$ | $50 \times 20$ | $100 \times 20$ |
|---------|----------------|----------------|-----------------|
| MWKR    | <b>1803.1</b>  | <b>3147.3</b>  | <b>5676.0</b>   |
| MOR     | 1831.7         | 3229.8         | 5728.3          |
| SPT     | 1813.8         | 3201.7         | 5718.7          |
| FIFO    | 1826.4         | 3177.6         | 5692.9          |

Table 7: Average makespans of models with different  $(N, M)$  on JSP validation dataset.

| Method     | $20 \times 20$ | $50 \times 20$ | $100 \times 20$ |
|------------|----------------|----------------|-----------------|
| RS (6,6)   | 1822.8         | 3242.7         | 5784.4          |
| RS (10,10) | <b>1803.1</b>  | <b>3147.3</b>  | 5676.0          |
| RS (15,15) | 1820.7         | 3170.6         | <b>5670.4</b>   |

For FJSP, we simply use the validation set used by (Song et al., 2023). Table 8 shows the average makespans of three models trained with different training sizes (6,6), (10,10) and (15,15) respectively and with MWKR on the validation dataset. The one with (10,10) outperforms others for all the collections in Song et al. (2023). Hence, (10,10) is also chosen in FJSP experiments in this paper.

Table 8: Average makespans of models with different  $(N, M)$  on FJSP validation dataset.

| Method     | $10 \times 5$ | $15 \times 10$ | $20 \times 5$ | $20 \times 10$ |
|------------|---------------|----------------|---------------|----------------|
| RS (6,6)   | 106.25        | 164.98         | 209.77        | 210.57         |
| RS (10,10) | <b>106.00</b> | <b>163.88</b>  | <b>209.07</b> | <b>210.18</b>  |
| RS (15,15) | 106.15        | 163.95         | 209.57        | 210.47         |

## E.2 Open Benchmarks

Table 9 lists the information about JSP and FJSP open benchmarks used in this paper. For JSP, TA benchmark has most instances, including 8 categories,  $15 \times 15$ ,  $20 \times 15$ ,  $20 \times 20$ ,  $30 \times 15$ ,  $30 \times 20$ ,  $50 \times 15$ ,  $50 \times 20$  and  $100 \times 20$ . For each category, there are 10 instances generated by their procedure. For other JSP benchmarks, they cover different problem sizes and data distributions as in the table.

For FJSP, two popular open benchmarks are MK, also known as Brandimarte instances, and LA, also known as Hurink instances (to distinguish LA benchmark for JSP). Hurink instances are categories into three types, edata, rdata and vdata, according to different distribution for assignable machines, denoted by LA(edata), LA(rdata) and LA(vdata) respectively, as described in (Hurink et al., 1994).

Table 9: Open benchmarks.

| Type | Benchmark                      | Instances | Min size       | Max size        |
|------|--------------------------------|-----------|----------------|-----------------|
| JSP  | TA (Taillard, 1993)            | 80        | $15 \times 15$ | $100 \times 20$ |
|      | ABZ (Adams et al., 1988)       | 5         | $10 \times 10$ | $20 \times 15$  |
|      | FT (Muth and Thompson, 1963)   | 3         | $6 \times 6$   | $20 \times 5$   |
|      | ORB (Applegate and Cook, 1991) | 10        | $10 \times 10$ | $10 \times 10$  |
|      | YN (Yamada and Nakano, 1992)   | 4         | $20 \times 20$ | $20 \times 20$  |
|      | SWV (Storer et al., 1992)      | 20        | $20 \times 10$ | $50 \times 10$  |
|      | LA (Lawrence, 1984)            | 40        | $10 \times 5$  | $30 \times 10$  |
| FJSP | MK (Brandimarte, 1993)         | 10        | $10 \times 6$  | $20 \times 15$  |
|      | LA (Hurink et al., 1994)       | 120       | $10 \times 5$  | $30 \times 10$  |

## F Additional Experiments

This section shows additional experiments conducted to support residual scheduling as follows.

- Appendix F.1 shows the comparisons between RS and other construction heuristics for other six JSP benchmarks.
- Appendix F.2 shows the comparisons between RS and other methods for FJSP instances generated by Song et al. (2023).
- Appendix F.3 shows the computation times of construction heuristics for comparison.
- Appendix F.4 shows the makespans of all instances in more detail.

## F.1 Other JSP Benchmarks

Table 10 shows the average makespan gaps for other six JSP open benchmarks, where the best performances (the smallest gaps) are marked in bold. Similar to the results in TA benchmark, in general, RS still performs the best, and generally outperforms the other methods except for that RS has slightly higher gaps than RS+op for the ORB benchmark. In fact, RS+op also generally outperforms the rest of methods, except for that RS+op is slightly higher than but very close to SchN for ABZ and YN benchmarks. It is also concluded that RS generally performs better than other construction heuristics.

Table 10: Average makespan gaps for other benchmarks.

| Dataset | ABZ          | FT           | ORB          | YN           | SWV          | LA           |
|---------|--------------|--------------|--------------|--------------|--------------|--------------|
| RS      | <b>0.116</b> | <b>0.089</b> | 0.165        | <b>0.166</b> | <b>0.122</b> | <b>0.075</b> |
| RS+op   | 0.156        | 0.162        | <b>0.159</b> | 0.186        | 0.202        | 0.097        |
| MWKR    | 0.166        | 0.196        | 0.251        | 0.197        | 0.284        | 0.126        |
| MOR     | 0.180        | 0.232        | 0.290        | 0.228        | 0.358        | 0.138        |
| SPT     | 0.251        | 0.280        | 0.262        | 0.306        | 0.230        | 0.199        |
| FIFO    | 0.247        | 0.288        | 0.297        | 0.258        | 0.373        | 0.188        |
| Park    | 0.214        | 0.222        | 0.218        | 0.247        | 0.228        | 0.141        |
| SchN    | 0.147        | 0.184        | 0.199        | 0.184        | 0.288        | 0.099        |

## F.2 FJSP Dataset from Song et al.

This subsection also compares our model with others on the FJSP instances generated by Song et al. (2023), as listed in Tables 11 and 12, where there are 100 FJSP instances for each problem size. The two tables also show the makespan results for RS, RS+100, DRL-G, DRL+100, MOR, MWKR, SPT, FIFO and OR-Tools, since they only provided the average makespans, not makespan for each instance. Note that the average makespan gap is not able to be calculated with Equation (6) without makespans from individual instances. Besides, for OR-Tools, their results are taken 1800 seconds to find the best-effort solutions. From Table 11, RS outperforms all the other construction heuristics, including DRL-G, for all problem sizes. From Table 12, RS+100 clearly outperforms DRL+100, DRL-G and RS by significant margins, like Table 4 in Subsection 5.

Table 11: Average makespans for the FJSP dataset by Song et al.

| Method   | $10 \times 5$ | $15 \times 10$ | $20 \times 05$ | $20 \times 10$ | $30 \times 10$ | $40 \times 10$ |
|----------|---------------|----------------|----------------|----------------|----------------|----------------|
| OR-Tools | 96.59         | 145.42         | 188.45         | 197.24         | 294.1          | 397.36         |
| RS       | <b>109.06</b> | <b>165.45</b>  | <b>207.27</b>  | <b>213.12</b>  | <b>311.16</b>  | <b>413.46</b>  |
| DRL-G    | 111.67        | 166.92         | 211.22         | 215.78         | 313.04         | 416.18         |
| MOR      | 116.69        | 173.40         | 217.17         | 221.86         | 320.18         | 425.19         |
| MWKR     | 115.29        | 169.18         | 216.98         | 220.85         | 319.89         | 425.70         |
| SPT      | 129.06        | 198.20         | 229.89         | 254.59         | 347.40         | 443.30         |
| FIFO     | 119.62        | 185.08         | 216.13         | 234.21         | 328.50         | 427.22         |

Table 12: Average makespans for the FJSP dataset by Song et al.

| Method   | $10 \times 5$ | $15 \times 10$ | $20 \times 05$ | $20 \times 10$ | $30 \times 10$ | $40 \times 10$ |
|----------|---------------|----------------|----------------|----------------|----------------|----------------|
| OR-Tools | 96.59         | 145.42         | 188.45         | 197.24         | 294.1          | 397.36         |
| RS       | 109.06        | 165.45         | 207.27         | 213.12         | 311.16         | 413.46         |
| RS+100   | <b>103.31</b> | <b>157.30</b>  | <b>201.73</b>  | <b>207.86</b>  | <b>305.27</b>  | <b>407.28</b>  |
| DRL-G    | 111.67        | 166.92         | 211.22         | 215.78         | 313.04         | 416.18         |
| DRL+100  | 105.61        | 160.36         | 207.50         | 214.87         | 312.20         | 415.14         |

## F.3 Computation Time

Table 13 and Table 14 show the computation time taken by methods for TA JSP benchmark and FJSP benchmarks. The four heuristics, MWKR, MOR, SPT and FIFO, take almost the same time to

obtain the scheduling solutions, so they are merged into the PDRs category. For TA benchmark, the computation times for L2D and SchN were reported by their works (Zhang et al., 2020) and (Park et al., 2021a), respectively, which also reported to use a machine with AMD Ryzen 3600 CPU and a single Nvidia GeForce 2070S GPU. To our knowledge, there were no time records available for the work (Park et al., 2021b), marked as "-". We observe that the time for RS is much less than SchN, and comparable to other DRL-based construction heuristics.

Table 13: Average computation times for TA JSP instances.

| Size | 15×15 | 20×15 | 20×20  | 30×15  | 30×20  | 50×15  | 50×20  | 100×20 | Avg.   |
|------|-------|-------|--------|--------|--------|--------|--------|--------|--------|
| RS   | 0.47s | 0.83s | 0.91s  | 1.93s  | 2.21s  | 5.30s  | 6.96s  | 27.32s | 5.74s  |
| PDRs | 0.05s | 0.08s | 0.12s  | 0.16s  | 0.24s  | 0.41s  | 0.60s  | 2.20s  | 0.48s  |
| L2D  | 0.40s | 0.60s | 1.10s  | 1.30s  | 1.50s  | 2.20s  | 3.6s   | 28.20s | 4.86s  |
| Park | -     | -     | -      | -      | -      | -      | -      | -      | -      |
| SchN | 3.50s | 6.60s | 11.00s | 17.10s | 28.30s | 52.50s | 96.00s | 444.0s | 82.38s |

Table 14: Average computation times for FJSP open benchmarks.

| Method | MK    | LA(rdata) | LA(edata) | LA(vdata) |
|--------|-------|-----------|-----------|-----------|
| RS     | 0.85s | 0.63s     | 0.80s     | 0.98s     |
| PDRs   | 0.41s | 0.47s     | 0.47s     | 0.46s     |
| DRL-G  | 0.90s | 0.97s     | 1.04s     | 0.96s     |

#### F.4 Experiment Results in More Detail

This section presents experiment results in more detail by listing makespans for all instances. First, Table 15 shows the average JSP makespan gaps in Figure 4, and Tables 16 and 17 show in more detail the makespans of all individual JSP instances obtained by RS, L2D and OR-tools. For OR-tools, the time limitation is set to half a day, i.e., it is set to the best-effort if OR-tools exceed the time limitation, where the cases are marked with †. For all 60 JSP instances larger than and equal to  $100 \times 15$ , RS reaches all optimum (marked in bold) except for four  $100 \times 20$  instances and one  $150 \times 20$  instance in Table 17.

Second, Tables 18 and 19 show the makespans of FJSP MK instances and LA instances, respectively. OPT indicates the best-known results from (Behnke and Geiger, 2012). From the tables, RS+100 obtains makespans the same as (marked in bold) or close to those in OPT for many instances.

Third, Table 20 and Table 21 show the makespans of all TA instances for Table 2. Park and SchN represent the work Park et al. (2021b) and ScheduleNet; and OPT is the best-effort results for OR-tools in 6000 seconds. To indicate the best performance of the construction heuristics, we mark in bold the makespan that is closest to that of OPT. We observe that RS performs best for most instances from Ta30 to Ta80, and outperforms others for nearly all the instances with sizes larger than and equal to  $30 \times 15$ .

Table 15: Average makespan gaps in Figure 4.

| Method          | OR-Tools       | RS      | L2D   |
|-----------------|----------------|---------|-------|
| $15 \times 15$  | 0              | 0.169   | 0.280 |
| $20 \times 15$  | 0 <sup>†</sup> | 0.172   | 0.273 |
| $20 \times 20$  | 0 <sup>†</sup> | 0.179   | 0.278 |
| $30 \times 15$  | 0 <sup>†</sup> | 0.119   | 0.252 |
| $30 \times 20$  | 0 <sup>†</sup> | 0.159   | 0.268 |
| $50 \times 15$  | 0              | 0.035   | 0.146 |
| $50 \times 20$  | 0 <sup>†</sup> | 0.082   | 0.205 |
| $100 \times 15$ | 0              | 0.000   | 0.045 |
| $100 \times 20$ | 0              | 0.008   | 0.080 |
| $150 \times 15$ | 0              | 0.000   | 0.030 |
| $150 \times 20$ | 0              | 0.00005 | 0.047 |
| $200 \times 15$ | 0              | 0.000   | 0.013 |
| $200 \times 20$ | 0              | 0.000   | 0.041 |

<sup>†</sup>means the best-effort solution from OR-Tools with a half day computation.

Table 16: Part 1 of makespans of all JSP instances of Table 15.

| Instance | $n \times m$    | L2D  | RS          | OR-Tools | $n \times m$    | L2D  | RS          | OR-Tools |
|----------|-----------------|------|-------------|----------|-----------------|------|-------------|----------|
| 01       | $15 \times 15$  | 1528 | 1386        | 1181     | -               | -    | -           | -        |
| 02       | $15 \times 15$  | 1422 | 1360        | 1172     | -               | -    | -           | -        |
| 03       | $15 \times 15$  | 1500 | 1494        | 1243     | -               | -    | -           | -        |
| 04       | $15 \times 15$  | 1651 | 1444        | 1230     | -               | -    | -           | -        |
| 05       | $15 \times 15$  | 1663 | 1502        | 1302     | -               | -    | -           | -        |
| 06       | $15 \times 15$  | 1479 | 1399        | 1237     | -               | -    | -           | -        |
| 07       | $15 \times 15$  | 1590 | 1363        | 1139     | -               | -    | -           | -        |
| 08       | $15 \times 15$  | 1432 | 1343        | 1148     | -               | -    | -           | -        |
| 09       | $15 \times 15$  | 1591 | 1371        | 1170     | -               | -    | -           | -        |
| 10       | $15 \times 15$  | 1492 | 1352        | 1168     | -               | -    | -           | -        |
| 01       | $20 \times 15$  | 1754 | 1438        | 1290     | $20 \times 20$  | 1864 | 1775        | 1483     |
| 02       | $20 \times 15$  | 1789 | 1585        | 1386     | $20 \times 20$  | 2116 | 1969        | 1669     |
| 03       | $20 \times 15$  | 1868 | 1660        | 1424     | $20 \times 20$  | 2225 | 1963        | 1697     |
| 04       | $20 \times 15$  | 1896 | 1714        | 1437     | $20 \times 20$  | 1989 | 1813        | 1510     |
| 05       | $20 \times 15$  | 1767 | 1606        | 1383     | $20 \times 20$  | 1749 | 1825        | 1539     |
| 06       | $20 \times 15$  | 1564 | 1496        | 1264     | $20 \times 20$  | 1950 | 1817        | 1524     |
| 07       | $20 \times 15$  | 1603 | 1467        | 1315     | $20 \times 20$  | 2065 | 1820        | 1614     |
| 08       | $20 \times 15$  | 1652 | 1648        | 1316     | $20 \times 20$  | 2103 | 1718        | 1512     |
| 09       | $20 \times 15$  | 1611 | 1576        | 1319     | $20 \times 20$  | 1914 | 1778        | 1482     |
| 10       | $20 \times 15$  | 1660 | 1605        | 1335     | $20 \times 20$  | 2001 | 1947        | 1597     |
| 01       | $30 \times 15$  | 2154 | 1949        | 1691     | $30 \times 20$  | 2390 | 2136        | 1939     |
| 02       | $30 \times 15$  | 2473 | 2108        | 1822     | $30 \times 20$  | 2501 | 2398        | 2056     |
| 03       | $30 \times 15$  | 2430 | 2129        | 2078     | $30 \times 20$  | 2269 | 2097        | 1835     |
| 04       | $30 \times 15$  | 2099 | 1922        | 1600     | $30 \times 20$  | 2470 | 2246        | 1936     |
| 05       | $30 \times 15$  | 2178 | 2038        | 1828     | $30 \times 20$  | 2420 | 2186        | 1958     |
| 06       | $30 \times 15$  | 2158 | 1955        | 1778     | $30 \times 20$  | 2414 | 2081        | 1824     |
| 07       | $30 \times 15$  | 2193 | 1993        | 1863     | $30 \times 20$  | 2639 | 2273        | 1921     |
| 08       | $30 \times 15$  | 2219 | 1996        | 1801     | $30 \times 20$  | 2233 | 2225        | 1804     |
| 09       | $30 \times 15$  | 2354 | 1950        | 1750     | $30 \times 20$  | 2569 | 2350        | 1973     |
| 10       | $30 \times 15$  | 1938 | 1785        | 1550     | $30 \times 20$  | 2491 | 2312        | 2001     |
| 01       | $50 \times 15$  | 3238 | 2886        | 2781     | $50 \times 20$  | 3732 | 3164        | 3047     |
| 02       | $50 \times 15$  | 3571 | 3119        | 2954     | $50 \times 20$  | 3477 | 3151        | 2760     |
| 03       | $50 \times 15$  | 3114 | 2848        | 2787     | $50 \times 20$  | 3381 | 3183        | 2969     |
| 04       | $50 \times 15$  | 3111 | 2859        | 2845     | $50 \times 20$  | 3446 | 3022        | 2847     |
| 05       | $50 \times 15$  | 3074 | <b>2924</b> | 2924     | $50 \times 20$  | 3267 | 2991        | 2775     |
| 06       | $50 \times 15$  | 3113 | 2801        | 2588     | $50 \times 20$  | 3565 | 3250        | 2962     |
| 07       | $50 \times 15$  | 3230 | <b>3036</b> | 3036     | $50 \times 20$  | 3678 | 3157        | 2920     |
| 08       | $50 \times 15$  | 3448 | 3030        | 2969     | $50 \times 20$  | 3723 | 3322        | 2919     |
| 09       | $50 \times 15$  | 3437 | 3164        | 2810     | $50 \times 20$  | 3538 | 3197        | 2873     |
| 10       | $50 \times 15$  | 3397 | 2879        | 2873     | $50 \times 20$  | 3456 | <b>3241</b> | 3241     |
| 01       | $100 \times 15$ | 5945 | <b>5493</b> | 5493     | $100 \times 20$ | 6215 | <b>5505</b> | 5505     |
| 02       | $100 \times 15$ | 5683 | <b>5517</b> | 5517     | $100 \times 20$ | 5978 | <b>5663</b> | 5663     |
| 03       | $100 \times 15$ | 5457 | <b>5212</b> | 5212     | $100 \times 20$ | 6136 | 5465        | 5443     |
| 04       | $100 \times 15$ | 6088 | <b>5802</b> | 5802     | $100 \times 20$ | 6193 | 5593        | 5511     |
| 05       | $100 \times 15$ | 5701 | <b>5568</b> | 5568     | $100 \times 20$ | 6147 | <b>6066</b> | 6066     |
| 06       | $100 \times 15$ | 6094 | <b>5821</b> | 5821     | $100 \times 20$ | 6176 | <b>5699</b> | 5699     |
| 07       | $100 \times 15$ | 6019 | <b>5756</b> | 5756     | $100 \times 20$ | 6054 | 5858        | 5574     |
| 08       | $100 \times 15$ | 5898 | <b>5876</b> | 5876     | $100 \times 20$ | 6040 | 5564        | 5505     |
| 09       | $100 \times 15$ | 5545 | <b>5367</b> | 5367     | $100 \times 20$ | 5981 | <b>5886</b> | 5886     |
| 10       | $100 \times 15$ | 5784 | <b>5303</b> | 5303     | $100 \times 20$ | 6089 | <b>5689</b> | 5689     |



Table 17: Part 2 of makespans of all JSP instances of Table 15.

| Instance | $n \times m$    | L2D          | RS           | OR-Tools | $n \times m$    | L2D   | RS           | OR-Tools |
|----------|-----------------|--------------|--------------|----------|-----------------|-------|--------------|----------|
| 01       | $150 \times 15$ | 8902         | <b>8470</b>  | 8470     | $150 \times 20$ | 8630  | <b>8146</b>  | 8146     |
| 02       | $150 \times 15$ | 8077         | <b>7871</b>  | 7871     | $150 \times 20$ | 8258  | <b>8139</b>  | 8139     |
| 03       | $150 \times 15$ | 8281         | <b>7964</b>  | 7964     | $150 \times 20$ | 8693  | <b>8178</b>  | 8178     |
| 04       | $150 \times 15$ | 8268         | <b>8215</b>  | 8215     | $150 \times 20$ | 8717  | <b>8219</b>  | 8219     |
| 05       | $150 \times 15$ | 8423         | <b>7974</b>  | 7974     | $150 \times 20$ | 8720  | <b>8663</b>  | 8663     |
| 06       | $150 \times 15$ | 8544         | <b>8506</b>  | 8506     | $150 \times 20$ | 8577  | <b>8086</b>  | 8086     |
| 07       | $150 \times 15$ | 8703         | <b>8227</b>  | 8227     | $150 \times 20$ | 8622  | 7966         | 7962     |
| 08       | $150 \times 15$ | 8265         | <b>7940</b>  | 7940     | $150 \times 20$ | 8395  | <b>8101</b>  | 8101     |
| 09       | $150 \times 15$ | 8522         | <b>8472</b>  | 8472     | $150 \times 20$ | 8308  | <b>8000</b>  | 8000     |
| 10       | $150 \times 15$ | 8099         | <b>7937</b>  | 7937     | $150 \times 20$ | 8576  | <b>8215</b>  | 8215     |
| 01       | $200 \times 15$ | 11018        | <b>10696</b> | 10696    | $200 \times 20$ | 10687 | <b>10545</b> | 10545    |
| 02       | $200 \times 15$ | 10770        | <b>10576</b> | 10576    | $200 \times 20$ | 11453 | <b>10464</b> | 10464    |
| 03       | $200 \times 15$ | 11030        | <b>10952</b> | 10952    | $200 \times 20$ | 12069 | <b>11040</b> | 11040    |
| 04       | $200 \times 15$ | <b>10881</b> | <b>10881</b> | 10881    | $200 \times 20$ | 11044 | <b>10644</b> | 10644    |
| 05       | $200 \times 15$ | 10706        | <b>10701</b> | 10701    | $200 \times 20$ | 11070 | <b>10793</b> | 10793    |
| 06       | $200 \times 15$ | 10540        | <b>10510</b> | 10510    | $200 \times 20$ | 11029 | <b>10427</b> | 10427    |
| 07       | $200 \times 15$ | 10810        | <b>10345</b> | 10345    | $200 \times 20$ | 10972 | <b>10699</b> | 10699    |
| 08       | $200 \times 15$ | <b>10355</b> | <b>10355</b> | 10355    | $200 \times 20$ | 11033 | <b>10710</b> | 10710    |
| 09       | $200 \times 15$ | 10983        | <b>10668</b> | 10668    | $200 \times 20$ | 10988 | <b>10811</b> | 10811    |
| 10       | $200 \times 15$ | 11036        | <b>10969</b> | 10969    | $200 \times 20$ | 10787 | <b>10666</b> | 10666    |

Table 18: Makespans of all MK instances (FJSP).

| Instance | $n \times m$   | RS         | RS+100     | OPT |
|----------|----------------|------------|------------|-----|
| mk01     | $10 \times 6$  | 42         | 41         | 39  |
| mk02     | $10 \times 6$  | 36         | 35         | 26  |
| mk03     | $15 \times 8$  | <b>204</b> | <b>204</b> | 204 |
| mk04     | $15 \times 8$  | 75         | 67         | 60  |
| mk05     | $15 \times 4$  | 185        | 180        | 172 |
| mk06     | $10 \times 15$ | 97         | 81         | 58  |
| mk07     | $20 \times 5$  | 216        | 188        | 139 |
| mk08     | $20 \times 10$ | <b>523</b> | <b>523</b> | 523 |
| mk09     | $20 \times 10$ | 316        | 311        | 307 |
| mk10     | $20 \times 15$ | 252        | 240        | 197 |

Table 19: Makespans of all LA instances (FJSP).

| Instance | $n \times m$   | edata |             |      | rdata |        |      | vdata      |            |      |
|----------|----------------|-------|-------------|------|-------|--------|------|------------|------------|------|
|          |                | RS    | RS+100      | OPT  | RS    | RS+100 | OPT  | RS         | RS+100     | OPT  |
| la01     | $10 \times 5$  | 721   | 621         | 609  | 595   | 586    | 571  | 587        | 575        | 570  |
| la02     | $10 \times 5$  | 799   | 747         | 655  | 567   | 549    | 530  | 553        | 535        | 529  |
| la03     | $10 \times 5$  | 628   | 586         | 550  | 520   | 489    | 478  | 486        | 484        | 477  |
| la04     | $10 \times 5$  | 685   | 623         | 568  | 567   | 513    | 502  | 546        | 513        | 502  |
| la05     | $10 \times 5$  | 593   | 517         | 503  | 483   | 464    | 457  | 520        | 461        | 457  |
| la06     | $15 \times 5$  | 847   | <b>833</b>  | 833  | 822   | 802    | 799  | 818        | 806        | 799  |
| la07     | $15 \times 5$  | 931   | 809         | 762  | 820   | 751    | 750  | 776        | 754        | 749  |
| la08     | $15 \times 5$  | 940   | 860         | 845  | 791   | 769    | 765  | 774        | 771        | 765  |
| la09     | $15 \times 5$  | 949   | 900         | 878  | 888   | 861    | 853  | 875        | 860        | 853  |
| la10     | $15 \times 5$  | 879   | <b>866</b>  | 866  | 845   | 816    | 804  | 821        | 808        | 804  |
| la11     | $20 \times 5$  | 1208  | 1107        | 1103 | 1081  | 1074   | 1071 | 1082       | 1073       | 1071 |
| la12     | $20 \times 5$  | 1001  | 979         | 960  | 959   | 938    | 936  | 946        | 938        | 936  |
| la13     | $20 \times 5$  | 1150  | 1074        | 1053 | 1048  | 1041   | 1038 | 1040       | 1040       | 1038 |
| la14     | $20 \times 5$  | 1195  | <b>1123</b> | 1123 | 1079  | 1074   | 1070 | 1077       | 1071       | 1070 |
| la15     | $20 \times 5$  | 1390  | 1269        | 1111 | 1176  | 1101   | 1090 | 1098       | 1091       | 1089 |
| la16     | $10 \times 10$ | 1002  | 952         | 892  | 870   | 751    | 717  | 763        | <b>717</b> | 717  |
| la17     | $10 \times 10$ | 794   | 781         | 707  | 767   | 682    | 646  | 690        | <b>646</b> | 646  |
| la18     | $10 \times 10$ | 911   | 897         | 842  | 751   | 717    | 666  | <b>663</b> | <b>663</b> | 663  |
| la19     | $10 \times 10$ | 973   | 915         | 796  | 860   | 787    | 700  | 652        | 628        | 617  |
| la20     | $10 \times 10$ | 1043  | 935         | 857  | 955   | 809    | 756  | 767        | <b>756</b> | 756  |
| la21     | $15 \times 10$ | 1248  | 1136        | 1017 | 956   | 916    | 835  | 820        | 817        | 806  |
| la22     | $15 \times 10$ | 993   | 980         | 882  | 888   | 850    | 760  | 784        | 754        | 739  |
| la23     | $15 \times 10$ | 1069  | 1038        | 950  | 918   | 897    | 842  | 836        | 821        | 815  |
| la24     | $15 \times 10$ | 1045  | 1025        | 909  | 908   | 883    | 808  | 812        | 794        | 777  |
| la25     | $15 \times 10$ | 1026  | 1016        | 941  | 908   | 866    | 791  | 876        | 771        | 756  |
| la26     | $20 \times 10$ | 1344  | 1239        | 1125 | 1188  | 1112   | 1061 | 1068       | 1059       | 1054 |
| la27     | $20 \times 10$ | 1419  | 1347        | 1186 | 1192  | 1152   | 1091 | 1116       | 1095       | 1085 |
| la28     | $20 \times 10$ | 1402  | 1294        | 1149 | 1167  | 1124   | 1080 | 1100       | 1077       | 1070 |
| la29     | $20 \times 10$ | 1325  | 1293        | 1118 | 1074  | 1038   | 998  | 1014       | 1001       | 994  |
| la30     | $20 \times 10$ | 1433  | 1373        | 1204 | 1185  | 1135   | 1078 | 1080       | 1078       | 1069 |
| la31     | $30 \times 10$ | 1748  | 1692        | 1539 | 1573  | 1541   | 1521 | 1544       | 1525       | 1520 |
| la32     | $30 \times 10$ | 1896  | 1819        | 1698 | 1711  | 1698   | 1659 | 1673       | 1665       | 1658 |
| la33     | $30 \times 10$ | 1716  | 1697        | 1547 | 1580  | 1512   | 1499 | 1514       | 1503       | 1497 |
| la34     | $30 \times 10$ | 1901  | 1723        | 1604 | 1582  | 1552   | 1536 | 1545       | 1542       | 1535 |
| la35     | $30 \times 10$ | 1911  | 1817        | 1736 | 1621  | 1583   | 1550 | 1564       | 1558       | 1549 |
| la36     | $15 \times 15$ | 1298  | 1254        | 1162 | 1146  | 1138   | 1030 | 965        | 955        | 948  |
| la37     | $15 \times 15$ | 1592  | 1498        | 1397 | 1239  | 1204   | 1077 | 1026       | 993        | 986  |
| la38     | $15 \times 15$ | 1407  | 1302        | 1144 | 1195  | 1083   | 962  | <b>943</b> | <b>943</b> | 943  |
| la39     | $15 \times 15$ | 1421  | 1275        | 1184 | 1243  | 1118   | 1024 | 984        | 935        | 922  |
| la40     | $15 \times 15$ | 1321  | 1291        | 1150 | 1104  | 1080   | 970  | 961        | <b>955</b> | 955  |

Table 20: Part 1 of makespans of all TA instances (JSP).

| Instance | $n \times m$   | SPT  | FIFO | MOR  | Park        | L2D  | SchN        | RS          | OPT  |
|----------|----------------|------|------|------|-------------|------|-------------|-------------|------|
| Ta01     | $15 \times 15$ | 1462 | 1486 | 1438 | 1389        | 1443 | 1452        | <b>1356</b> | 1231 |
| Ta02     | $15 \times 15$ | 1446 | 1486 | 1452 | 1519        | 1544 | 1411        | <b>1372</b> | 1244 |
| Ta03     | $15 \times 15$ | 1495 | 1461 | 1418 | 1457        | 1440 | <b>1396</b> | 1467        | 1218 |
| Ta04     | $15 \times 15$ | 1708 | 1575 | 1457 | 1465        | 1637 | <b>1348</b> | 1424        | 1175 |
| Ta05     | $15 \times 15$ | 1618 | 1457 | 1448 | <b>1352</b> | 1619 | 1382        | 1378        | 1224 |
| Ta06     | $15 \times 15$ | 1522 | 1528 | 1486 | 1481        | 1601 | 1413        | <b>1382</b> | 1238 |
| Ta07     | $15 \times 15$ | 1434 | 1497 | 1456 | 1554        | 1568 | 1380        | <b>1356</b> | 1227 |
| Ta08     | $15 \times 15$ | 1457 | 1496 | 1482 | 1488        | 1468 | <b>1374</b> | 1438        | 1217 |
| Ta09     | $15 \times 15$ | 1622 | 1642 | 1594 | 1556        | 1627 | 1523        | <b>1497</b> | 1274 |
| Ta10     | $15 \times 15$ | 1697 | 1600 | 1582 | 1501        | 1527 | 1493        | <b>1442</b> | 1241 |
| Ta11     | $20 \times 15$ | 1865 | 1701 | 1665 | 1626        | 1794 | 1612        | <b>1590</b> | 1357 |
| Ta12     | $20 \times 15$ | 1667 | 1670 | 1739 | 1668        | 1805 | 1600        | <b>1574</b> | 1367 |
| Ta13     | $20 \times 15$ | 1802 | 1862 | 1642 | 1715        | 1932 | 1625        | <b>1555</b> | 1342 |
| Ta14     | $20 \times 15$ | 1635 | 1812 | 1662 | 1642        | 1664 | 1590        | <b>1511</b> | 1345 |
| Ta15     | $20 \times 15$ | 1835 | 1788 | 1682 | 1672        | 1730 | 1676        | <b>1557</b> | 1339 |
| Ta16     | $20 \times 15$ | 1965 | 1825 | 1638 | 1700        | 1710 | 1550        | <b>1549</b> | 1360 |
| Ta17     | $20 \times 15$ | 2059 | 1899 | 1856 | <b>1678</b> | 1897 | 1753        | 1739        | 1462 |
| Ta18     | $20 \times 15$ | 1808 | 1833 | 1710 | 1684        | 1794 | <b>1668</b> | 1705        | 1396 |
| Ta19     | $20 \times 15$ | 1789 | 1716 | 1651 | 1900        | 1682 | 1622        | <b>1571</b> | 1332 |
| Ta20     | $20 \times 15$ | 1710 | 1827 | 1622 | 1752        | 1739 | 1604        | <b>1560</b> | 1348 |
| Ta21     | $20 \times 20$ | 2175 | 2089 | 1964 | 2199        | 2252 | 1921        | <b>1910</b> | 1642 |
| Ta22     | $20 \times 20$ | 1965 | 2146 | 1905 | 2049        | 2102 | 1844        | <b>1758</b> | 1600 |
| Ta23     | $20 \times 20$ | 1933 | 2010 | 1922 | 2006        | 2085 | 1879        | <b>1867</b> | 1557 |
| Ta24     | $20 \times 20$ | 2230 | 1989 | 1943 | 2020        | 2200 | 1922        | <b>1912</b> | 1644 |
| Ta25     | $20 \times 20$ | 1950 | 2160 | 1957 | 1981        | 2201 | <b>1897</b> | 1952        | 1595 |
| Ta26     | $20 \times 20$ | 2188 | 2182 | 1964 | 2057        | 2176 | <b>1887</b> | 1918        | 1643 |
| Ta27     | $20 \times 20$ | 2096 | 2091 | 2160 | 2187        | 2132 | <b>2009</b> | 2015        | 1680 |
| Ta28     | $20 \times 20$ | 1968 | 1980 | 1952 | 2054        | 2146 | <b>1813</b> | 1866        | 1603 |
| Ta29     | $20 \times 20$ | 2166 | 2011 | 1899 | 2210        | 1952 | <b>1875</b> | 1916        | 1625 |
| Ta30     | $20 \times 20$ | 1999 | 1941 | 2017 | 2140        | 2035 | 1913        | <b>1804</b> | 1584 |
| Ta31     | $30 \times 15$ | 2335 | 2277 | 2143 | 2251        | 2565 | 2055        | <b>2004</b> | 1764 |
| Ta32     | $30 \times 15$ | 2432 | 2279 | 2188 | 2378        | 2388 | 2268        | <b>2097</b> | 1784 |
| Ta33     | $30 \times 15$ | 2453 | 2481 | 2308 | 2316        | 2324 | 2281        | <b>2059</b> | 1791 |
| Ta34     | $30 \times 15$ | 2434 | 2546 | 2193 | 2319        | 2332 | <b>2061</b> | 2093        | 1829 |
| Ta35     | $30 \times 15$ | 2497 | 2478 | 2255 | 2333        | 2505 | 2218        | <b>2179</b> | 2007 |
| Ta36     | $30 \times 15$ | 2445 | 2433 | 2307 | 2210        | 2497 | 2154        | <b>2102</b> | 1819 |
| Ta37     | $30 \times 15$ | 2664 | 2382 | 2190 | 2201        | 2325 | 2112        | <b>1968</b> | 1771 |
| Ta38     | $30 \times 15$ | 2155 | 2277 | 2179 | 2151        | 2302 | <b>1970</b> | 1999        | 1673 |
| Ta39     | $30 \times 15$ | 2477 | 2255 | 2167 | 2138        | 2410 | 2146        | <b>1978</b> | 1795 |
| Ta40     | $30 \times 15$ | 2301 | 2069 | 2028 | 2007        | 2140 | 2030        | <b>1986</b> | 1669 |
| Ta41     | $30 \times 20$ | 2499 | 2543 | 2538 | 2654        | 2667 | 2572        | <b>2435</b> | 2005 |
| Ta42     | $30 \times 20$ | 2710 | 2669 | 2440 | 2579        | 2664 | 2397        | <b>2253</b> | 1937 |
| Ta43     | $30 \times 20$ | 2434 | 2506 | 2432 | 2737        | 2431 | 2310        | <b>2190</b> | 1846 |
| Ta44     | $30 \times 20$ | 2906 | 2540 | 2426 | 2772        | 2714 | 2456        | <b>2343</b> | 1979 |
| Ta45     | $30 \times 20$ | 2640 | 2565 | 2487 | 2435        | 2637 | 2445        | <b>2337</b> | 2000 |
| Ta46     | $30 \times 20$ | 2667 | 2582 | 2490 | 2681        | 2776 | 2541        | <b>2330</b> | 2004 |
| Ta47     | $30 \times 20$ | 2620 | 2508 | 2286 | 2428        | 2476 | 2280        | <b>2270</b> | 1889 |
| Ta48     | $30 \times 20$ | 2620 | 2541 | 2371 | 2440        | 2490 | 2358        | <b>2279</b> | 1941 |
| Ta49     | $30 \times 20$ | 2666 | 2550 | 2397 | 2446        | 2556 | 2301        | <b>2249</b> | 1961 |
| Ta50     | $30 \times 20$ | 2429 | 2531 | 2469 | 2530        | 2628 | 2453        | <b>2251</b> | 1923 |

Table 21: Part 2 of makespans of all TA instances (JSP).

| Instance | $n \times m$    | SPT  | FIFO | MOR  | Park        | L2D  | SchN | RS          | OPT  |
|----------|-----------------|------|------|------|-------------|------|------|-------------|------|
| Ta51     | $50 \times 15$  | 3856 | 3590 | 3567 | 3145        | 3599 | 3382 | <b>2989</b> | 2760 |
| Ta52     | $50 \times 15$  | 3266 | 3365 | 3303 | 3157        | 3341 | 3231 | <b>2986</b> | 2756 |
| Ta53     | $50 \times 15$  | 3507 | 3169 | 3115 | 3103        | 3186 | 3083 | <b>2851</b> | 2717 |
| Ta54     | $50 \times 15$  | 3142 | 3218 | 3265 | 3278        | 3266 | 3068 | <b>2913</b> | 2839 |
| Ta55     | $50 \times 15$  | 3225 | 3291 | 3279 | 3142        | 3232 | 3078 | <b>2915</b> | 2679 |
| Ta56     | $50 \times 15$  | 3530 | 3329 | 3100 | 3258        | 3378 | 3065 | <b>2982</b> | 2781 |
| Ta57     | $50 \times 15$  | 3725 | 3654 | 3335 | 3230        | 3471 | 3266 | <b>3126</b> | 2943 |
| Ta58     | $50 \times 15$  | 3365 | 3362 | 3420 | 3469        | 3732 | 3321 | <b>3108</b> | 2885 |
| Ta59     | $50 \times 15$  | 3294 | 3357 | 3117 | 3108        | 3381 | 3044 | <b>2887</b> | 2655 |
| Ta60     | $50 \times 15$  | 3500 | 3129 | 3044 | 3256        | 3352 | 3036 | <b>2861</b> | 2723 |
| Ta61     | $50 \times 20$  | 3606 | 3690 | 3376 | 3425        | 3654 | 3202 | <b>3133</b> | 2868 |
| Ta62     | $50 \times 20$  | 3639 | 3657 | 3417 | 3626        | 3722 | 3339 | <b>3234</b> | 2869 |
| Ta63     | $50 \times 20$  | 3521 | 3367 | 3276 | <b>3110</b> | 3536 | 3118 | 3130        | 2755 |
| Ta64     | $50 \times 20$  | 3447 | 3179 | 3057 | 3329        | 3631 | 2989 | <b>2982</b> | 2702 |
| Ta65     | $50 \times 20$  | 3332 | 3273 | 3249 | 3339        | 3359 | 3168 | <b>3007</b> | 2725 |
| Ta66     | $50 \times 20$  | 3677 | 3610 | 3335 | 3340        | 3555 | 3199 | <b>3153</b> | 2845 |
| Ta67     | $50 \times 20$  | 3487 | 3612 | 3392 | 3371        | 3567 | 3236 | <b>3054</b> | 2825 |
| Ta68     | $50 \times 20$  | 3336 | 3471 | 3251 | 3265        | 3680 | 3072 | <b>2991</b> | 2784 |
| Ta69     | $50 \times 20$  | 3862 | 3607 | 3526 | 3798        | 3592 | 3535 | <b>3305</b> | 3071 |
| Ta70     | $50 \times 20$  | 3801 | 3784 | 3590 | 3919        | 3643 | 3436 | <b>3304</b> | 2995 |
| Ta71     | $100 \times 20$ | 6232 | 6270 | 5938 | 5962        | 6452 | 5879 | <b>5679</b> | 5464 |
| Ta72     | $100 \times 20$ | 5973 | 5671 | 5639 | 5522        | 5695 | 5456 | <b>5297</b> | 5181 |
| Ta73     | $100 \times 20$ | 6482 | 6357 | 6128 | 6335        | 6462 | 6052 | <b>5807</b> | 5568 |
| Ta74     | $100 \times 20$ | 6062 | 6003 | 5642 | 5827        | 5885 | 5513 | <b>5413</b> | 5339 |
| Ta75     | $100 \times 20$ | 6217 | 6420 | 6212 | 6042        | 6355 | 5992 | <b>5623</b> | 5392 |
| Ta76     | $100 \times 20$ | 6370 | 6183 | 5936 | 5707        | 6135 | 5773 | <b>5487</b> | 5342 |
| Ta77     | $100 \times 20$ | 6045 | 5952 | 5829 | 5737        | 6056 | 5637 | <b>5475</b> | 5436 |
| Ta78     | $100 \times 20$ | 6143 | 6328 | 5886 | 5979        | 6101 | 5833 | <b>5426</b> | 5394 |
| Ta79     | $100 \times 20$ | 6018 | 6003 | 5652 | 5799        | 5943 | 5556 | <b>5411</b> | 5358 |
| Ta80     | $100 \times 20$ | 5848 | 5763 | 5707 | 5718        | 5892 | 5545 | <b>5448</b> | 5183 |
